# Supplementary material for: The Intricate Interplay between Epigenetic Events, Alternative Splicing and Noncoding RNA Deregulation in Colorectal Cancer
Source: PubMed Central journal article supplement (PMC6721676; doi:10.3390/cells8080929), 2019-08-19
Supplement: cells-08-00929-s001.pdf [file cells-08-00929-s001.pdf]

## Supplementary Materials

**Table S1 LncRNAs sponging microRNAs in CRC**

| <b>LncRNA</b> | <b>Sponged miRNA</b>  | <b>miRNA target</b>                         | <b>Tumorigenic effects</b>                                                        | <b>PMID</b>          |
|---------------|-----------------------|---------------------------------------------|-----------------------------------------------------------------------------------|----------------------|
| XIST          | miR-124               | SGK1 upregulated                            | doxorubicin resistance                                                            | 30439718             |
| LINC01410     | miR-3128              |                                             | promotes colon cancer cell proliferation and invasion                             | 30546401             |
| HOTAIR        | miR-203a-3p           | Wnt/ $\beta$ -catenin signalling            | promotes proliferation and chemoresistance                                        | 29680837             |
| H19           | miR-29b-3p            | PGRN/Wnt axis                               | promotes EMT                                                                      | 29754471             |
| H19           | miR-194-5p            | FoxM1                                       | promotes EMT                                                                      | 30278464             |
| HOXA11-AS     | miR-125a-5p           | PADI2                                       | liver metastasis                                                                  | 29050308             |
| MIA-RAB4B     | miR-24                | RAB4B, PIM2 and TAOK1                       | contributes to familial adenomatous polyposis-like phenotype                      | 28306719             |
| LINC01503     | miR-4492              | FOXK1 signalling                            | promotes CRC cell proliferation and invasion                                      | 30542444             |
| LINC00174     | miR-1910-3p           | TAZ signal pathway                          | facilitate colorectal carcinoma progression                                       | 29729381             |
| FBXL19-AS1    | miR-203               |                                             | proliferation and invasion                                                        | 28479250             |
| NORAD         | miR-202-5p            |                                             | contributes to proliferation, migration, invasion, and metastasis; poor prognosis | 30349308<br>29471886 |
| CRNDE         | miR-181a-5p           | Wnt/ $\beta$ -catenin signalling            | promotes proliferation and chemoresistance                                        | 28086904             |
| CRNDE         | miR-217               | TCF7L2 and Wnt/ $\beta$ -catenin signalling | CRC progression                                                                   | 28472810             |
| TP73-AS1      | miR-194               | TGF $\alpha$                                | promotes proliferation, migration and invasion                                    | 30010111             |
| LIFR-AS1      | miR-29a               | TNFAIP3                                     | resistance to photodynamic therapy                                                | 29807108             |
| HEIH          | miR-939               | NF- $\kappa$ B                              | promotes CRC tumorigenesis                                                        | 29081216             |
| CHRF          | miR-489               | TWIST1/EMT signalling pathway               | promotes metastasis                                                               | 28430582             |
| ABHD11-AS1    | miR-133a              | SOX4                                        | promotes CRC development                                                          | 30429229             |
| MALAT1        | miR-106b-5p           | SLAIN2                                      | promotes the invasion and metastasis                                              | 30797712             |
| MALAT1        | miR-129-5p            | HMGB1                                       | induces colon cancer development                                                  | 29226325             |
| GAPLINC       | miR-34a               | c-MET signal pathway                        | promotes cells migration and invasion                                             | 29427222             |
| SNHG6         | miR-26a/b and miR-214 | EZH2                                        | promotes cell growth, migration, and invasion                                     | 30626446             |
| SNHG6         | miR-181a-5p           | E2F5                                        | CRC progression                                                                   | 30666158             |
| SNHG6         | miR-760               | FOXC1                                       | CRC progression                                                                   | 30254467             |
| SNHG3         | miR-182-5p            | upregulating c-Myc and its target genes     | promotes CRC progression                                                          | 28731158             |

|       |             |                                                |                                                                                      |          |
|-------|-------------|------------------------------------------------|--------------------------------------------------------------------------------------|----------|
| SNHG5 | miR-132-3p  | CREB5                                          | promotes proliferation, migration and metastasis of CRC cells but inhibits apoptosis | 30395767 |
| NEAT1 | miR-193a-3p | IL17RD                                         | promotes the tumorigenesis                                                           | 30407674 |
| NEAT1 | miR-193a-3p | KRAS                                           | promotes the tumorigenesis                                                           | 30575330 |
| GAS5  | miR-221     |                                                | proliferation, migration and invasion                                                | 29630521 |
| UCA1  | miR-28-5p   | HOXB3                                          | proliferation and migration                                                          | 30652355 |
| UCA1  | miR-204-5p  | CREB1/BCL2/R<br>AB22A<br>regulatory<br>network | enhances cell proliferation and 5-fluorouracil resistance                            | 27046651 |
| UCA1  | miR-143     | Cyclin-D1,<br>KRAS and p27                     | enhances cell proliferation and metastasis                                           | 29948578 |

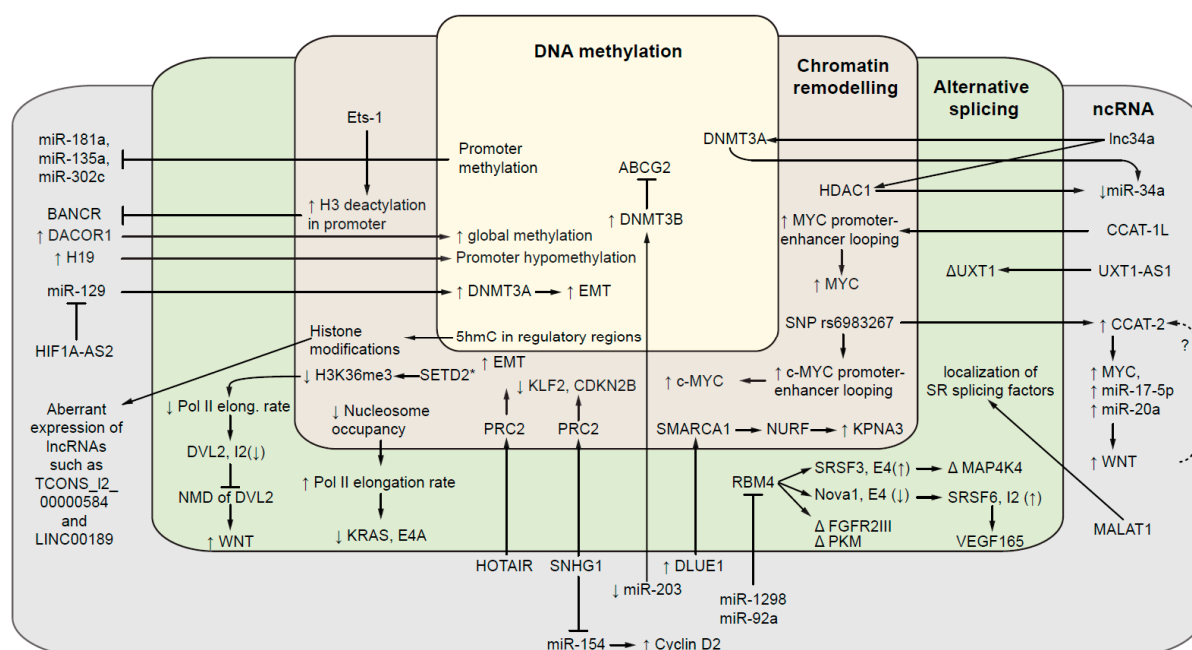

**Figure S1.** Overview of cross-talk between gene-regulatory layers in CRC (A vector graphics version). This figure depicts selected examples of the deregulated interplay between epigenetic events, alternative splicing (AS) and noncoding RNA in colorectal cancer. See the text of the manuscript for further details.  $\uparrow$  and  $\downarrow$  arrows represent up- or down-regulation or higher or lower activity of a factor, respectively. Intron and exons are abbreviated as E or I, respectively. In the cases of AS,  $\uparrow$  and  $\downarrow$  represent increased and decreased usage of an exon or intron, respectively.  $\Delta$  represents isoform switching of a transcript due to AS. SET2D\* represents a mutant of SET2D. The dashed arrow with question mark (?) represents a predicted feedback loop between WNT and CCAT-2.
